# Supplementary material for: RitR is an archetype for a novel family of redox sensors in the streptococci that has evolved from two-component response regulators and is required for pneumococcal colonization
Source: PubMed Central journal article supplement (PMC5965902; doi:10.1371/journal.ppat.1007052), 2018-05-11
Supplement: ppat.1007052.s011.pdf [file ppat.1007052.s011.pdf]

| <b>Table S1. Plasmids, strains and primers used in this study</b> |                                                                                                                                                                          |                              |
|-------------------------------------------------------------------|--------------------------------------------------------------------------------------------------------------------------------------------------------------------------|------------------------------|
| <b>Plasmid</b>                                                    | <b>Description</b>                                                                                                                                                       | <b>Source or reference</b>   |
| pNE1                                                              | <i>E. coli</i> - <i>S. pneumoniae</i> shuttle vector                                                                                                                     | Bartilson <i>et al.</i> 2001 |
| pNE1-FLAG-RitR (WT)                                               | pNE1 <i>P<sub>ermAM</sub></i> -FLAG-RitR (WT)                                                                                                                            | Maule <i>et.al.</i> 2015     |
| pNE1-FLAG-RitR (C128A)                                            | pNE1 <i>P<sub>ermAM</sub></i> -FLAG-RitR (C128A)                                                                                                                         | Maule <i>et.al.</i> 2015     |
| pE-SUMO                                                           | N-terminal His <sub>6</sub> -SUMO fusion protein expression vector                                                                                                       | Life Sensors Inc.            |
| pE-SUMO-RitR <sub>WT</sub>                                        | pE-SUMO RitR WT                                                                                                                                                          | Maule <i>et.al.</i> 2015     |
| pE-SUMO-RitR <sub>C128S</sub>                                     | pE-SUMO RitR C128S                                                                                                                                                       | Maule <i>et.al.</i> 2015     |
| pE-SUMO-RitR <sub>GADDY</sub>                                     | pE-SUMO RitR GADDY                                                                                                                                                       | This work                    |
| pE-SUMO-RitR <sub>L86A/V96A</sub>                                 | pE-SUMO RitR L86A/V96A                                                                                                                                                   | Maule <i>et.al.</i> 2015     |
| pPP2                                                              | <i>S. pneumoniae bgaA</i> integrative plasmid with promoter-less <i>E. coli lacZ</i>                                                                                     | Halfmann <i>et al.</i> 2007  |
| pPP2 <i>P<sub>piu1-3</sub></i>                                    | pPP2 with <i>piu</i> promoter containing RitR binding sites 1-3                                                                                                          | This work                    |
| <b>Strain</b>                                                     | <b>Genotype and or description</b>                                                                                                                                       | <b>Source or reference</b>   |
| <b><i>E. coli</i> strains</b>                                     |                                                                                                                                                                          |                              |
| DH5 $\alpha$                                                      | F- $\Phi$ 80 <i>lacZ</i> $\Delta$ M15 $\Delta$ ( <i>lacZYA-argF</i> ) U169 <i>recA1 endA1 hsdR17</i> (rK-, mK+) <i>phoA supE44</i> $\lambda$ - <i>thi-1 gyrA96 relA1</i> | Sambrook <i>et al.</i> 1989  |
| BL21(DE3)                                                         | F- <i>ompT hsdSB</i> (rB-, mB-) <i>gal dcm</i> (DE3)                                                                                                                     | Studier & Moffatt 1986       |
| SUMO-RitR <sub>WT</sub>                                           | BL21(DE3) pE-SUMO His <sub>6</sub> -SUMO-RitR WT expression strain                                                                                                       | Maule <i>et.al.</i> 2015     |
| SUMO-RitR <sub>C128S</sub>                                        | BL21(DE3) pE-SUMO His <sub>6</sub> -SUMO-RitR C128S expression strain                                                                                                    | Maule <i>et.al.</i> 2015     |

|                                |                                                                           |                          |
|--------------------------------|---------------------------------------------------------------------------|--------------------------|
| SUMO-RitR <sub>C128D</sub>     | BL21(DE3) pE-SUMO His <sub>6</sub> -SUMO-RitR C128D expression strain     | This work                |
| SUMO-RitR <sub>WT</sub>        | BL21(DE3) pE-SUMO His <sub>6</sub> -SUMO-RitR WT expression strain        | Maule <i>et.al.</i> 2015 |
| SUMO-RitR <sub>C128S</sub>     | BL21(DE3) pE-SUMO His <sub>6</sub> -SUMO-RitR C128S expression strain     | Maule <i>et.al.</i> 2015 |
| SUMO-RitR <sub>C128D</sub>     | BL21(DE3) pE-SUMO His <sub>6</sub> -SUMO-RitR C128D expression strain     | This work                |
| SUMO-RitR <sub>GADDY</sub>     | BL21(DE3) pE-SUMO His <sub>6</sub> -SUMO-RitR GADDY expression strain     | This work                |
| SUMO-RitR <sub>L86A/V96A</sub> | BL21(DE3) pE-SUMO His <sub>6</sub> -SUMO-RitR L86A/V96A expression strain | Maule <i>et.al.</i> 2015 |

***S. pneumoniae*  
strains**

|                                         |                                                                                                                     |                            |
|-----------------------------------------|---------------------------------------------------------------------------------------------------------------------|----------------------------|
| R800                                    | R6 derivative, unencapsulated derivative of D39 Hex <sup>+</sup> Kan <sup>s</sup> RecA <sup>+</sup> Sm <sup>s</sup> | Lefevre <i>et al.</i> 1979 |
| R800 <i>rpsL</i>                        | R800 carrying L56T mutation in <i>rpsL</i> Sm <sup>r</sup>                                                          | This work                  |
| R800 <i>ritR::kan-rpsL</i> <sup>+</sup> | R800 <i>rpsL</i> with <i>kan-rpsL</i> <sup>+</sup> in <i>ritR</i> locus Kan <sup>r</sup> Sm <sup>s</sup>            | This work                  |
| R800 $\Delta$ <i>ritR</i>               | R800 <i>rpsL</i> with marker-less deletion of <i>ritR</i> Sm <sup>r</sup>                                           | This work                  |
| R800 $\Delta$ <i>ritR::ritR</i> WT      | R800 <i>rpsL</i> with <i>ritR</i> WT reintroduced into <i>ritR</i> locus Sm <sup>r</sup>                            | This work                  |
| R800 $\Delta$ <i>ritR::ritR</i> C128A   | R800 <i>rpsL</i> with <i>ritR</i> C128A reintroduced into <i>ritR</i> locus Sm <sup>r</sup>                         | This work                  |
| R800 $\Delta$ <i>ritR::ritR</i> C128S   | R800 <i>rpsL</i> with <i>ritR</i> C128S reintroduced into <i>ritR</i> locus Sm <sup>r</sup>                         | This work                  |
| R800 $\Delta$ <i>ritR::ritR</i> C128D   | R800 <i>rpsL</i> with <i>ritR</i> C128D reintroduced into <i>ritR</i> locus Sm <sup>r</sup>                         | This work                  |
| D39                                     | Strain NTCC 7466, encapsulated serotype 2 strain                                                                    | NTCC, UK                   |
| D39 <i>rpsL</i>                         | D39 carrying L56T mutation in <i>rpsL</i> Sm <sup>r</sup>                                                           | This work                  |
| D39 <i>ritR::kan-rpsL</i> <sup>+</sup>  | D39 <i>rpsL</i> with <i>kan-rpsL</i> <sup>+</sup> cassette in <i>ritR</i> locus Kan <sup>r</sup> Sm <sup>s</sup>    | This work                  |
| D39 $\Delta$ <i>ritR</i>                | D39 <i>rpsL</i> with marker-less deletion of <i>ritR</i>                                                            | This work                  |
| D39 $\Delta$ <i>ritR::ritR</i> WT       | D39 <i>rpsL</i> with <i>ritR</i> WT reintroduced into <i>ritR</i> locus Sm <sup>r</sup>                             | This work                  |

|                                                                   |                                                                                                                |                          |
|-------------------------------------------------------------------|----------------------------------------------------------------------------------------------------------------|--------------------------|
| D39 $\Delta ritR::ritR$ C128A                                     | D39 <i>rpsL</i> with <i>ritR</i> C128A reintroduced into <i>ritR</i> locus Sm <sup>r</sup>                     | This work                |
| D39 $\Delta ritR::ritR$ C128S                                     | D39 <i>rpsL</i> with <i>ritR</i> C128S reintroduced into <i>ritR</i> locus Sm <sup>r</sup>                     | This work                |
| D39 $\Delta ritR::ritR$ C128D                                     | D39 <i>rpsL</i> with <i>ritR</i> C128D reintroduced into <i>ritR</i> locus Sm <sup>r</sup>                     | This work                |
| R800 <i>rpsL</i> P <sub>piu1-3</sub> :: <i>lacZ</i>               | R800 <i>rpsL</i> but <i>bgaA::tetM-P<sub>piu1-3</sub>::lacZ</i> Sm <sup>r</sup> Tet <sup>r</sup>               | This work                |
| R800 $\Delta ritR$ P <sub>piu1-3</sub> :: <i>lacZ</i>             | R800 $\Delta ritR$ but <i>bgaA::tetM-P<sub>piu1-3</sub>::lacZ</i> Sm <sup>r</sup> Tet <sup>r</sup>             | This work                |
| R800 $\Delta ritR::ritR$ WT P <sub>piu1-3</sub> :: <i>lacZ</i>    | R800 $\Delta ritR::ritR$ WT but <i>bgaA::tetM-P<sub>piu1-3</sub>::lacZ</i> Sm <sup>r</sup> Tet <sup>r</sup>    | This work                |
| R800 $\Delta ritR::ritR$ C128A P <sub>piu1-3</sub> :: <i>lacZ</i> | R800 $\Delta ritR::ritR$ C128A but <i>bgaA::tetM-P<sub>piu1-3</sub>::lacZ</i> Sm <sup>r</sup> Tet <sup>r</sup> | This work                |
| R800 $\Delta ritR::ritR$ C128S P <sub>piu1-3</sub> :: <i>lacZ</i> | R800 $\Delta ritR::ritR$ C128S but <i>bgaA::tetM-P<sub>piu1-3</sub>::lacZ</i> Sm <sup>r</sup> Tet <sup>r</sup> | This work                |
| R800 $\Delta ritR::ritR$ C128D P <sub>piu1-3</sub> :: <i>lacZ</i> | R800 $\Delta ritR::ritR$ C128D but <i>bgaA::tetM-P<sub>piu1-3</sub>::lacZ</i> Sm <sup>r</sup> Tet <sup>r</sup> | This work                |
| D39 <i>rpsL</i> P <sub>piu1-3</sub> :: <i>lacZ</i>                | D38 <i>rpsL</i> but <i>bgaA::tetM-P<sub>piu1-3</sub>::lacZ</i> Sm <sup>r</sup> Tet <sup>r</sup>                | This work                |
| D39 $\Delta ritR$ P <sub>piu1-3</sub> :: <i>lacZ</i>              | D39 $\Delta ritR$ but <i>bgaA::tetM-P<sub>piu1-3</sub>::lacZ</i> Sm <sup>r</sup> Tet <sup>r</sup>              | This work                |
| D39 $\Delta ritR::ritR$ WT P <sub>piu1-3</sub> :: <i>lacZ</i>     | D39 $\Delta ritR::ritR$ WT but <i>bgaA::tetM-P<sub>piu1-3</sub>::lacZ</i> Sm <sup>r</sup> Tet <sup>r</sup>     | This work                |
| D39 $\Delta ritR::ritR$ C128A P <sub>piu1-3</sub> :: <i>lacZ</i>  | D39 $\Delta ritR::ritR$ C128A but <i>bgaA::tetM-P<sub>piu1-3</sub>::lacZ</i> Sm <sup>r</sup> Tet <sup>r</sup>  | This work                |
| D39 $\Delta ritR::ritR$ C128S P <sub>piu1-3</sub> :: <i>lacZ</i>  | D39 $\Delta ritR::ritR$ C128S but <i>bgaA::tetM-P<sub>piu1-3</sub>::lacZ</i> Sm <sup>r</sup> Tet <sup>r</sup>  | This work                |
| D39 $\Delta ritR::ritR$ C128D P <sub>piu1-3</sub> :: <i>lacZ</i>  | D39 $\Delta ritR::ritR$ C128D but <i>bgaA::tetM-P<sub>piu1-3</sub>::lacZ</i> Sm <sup>r</sup> Tet <sup>r</sup>  | This work                |
| R800 <i>ritR::kan</i> FLAG-RitR (WT)                              | R800 $\Delta ritR$ transformed pNE1-FLAG-RitR (WT) Kan <sup>r</sup> Spec <sup>r</sup>                          | Maule <i>et.al.</i> 2015 |
| R800 <i>ritR::kan</i> FLAG-RitR (C128A)                           | R800 $\Delta ritR$ transformed with pNE1-FLAG-RitR (C128A) Kan <sup>r</sup> Spec <sup>r</sup>                  | Maule <i>et.al.</i> 2015 |

| Primer name          | 5'- 3' Sequence <sup>b</sup>            | Gene target                      |
|----------------------|-----------------------------------------|----------------------------------|
| <i>rpsL</i> lift F   | 5'-GTAGTTGGCTCTGTTGCAGG-3'              | Upstream of <i>rpsL</i>          |
| <i>rpsL</i> lift R   | 5'-GTTAGTTAGCCGATATGAGCTGG-3'           | downstream of <i>rpsL</i>        |
| <i>rpsL</i> check F  | 5'-CAACATCGTCCCAAGTCCATAG-3'            | Upstream of <i>rpsL</i> lift F   |
| <i>rpsL</i> check R  | 5'-GTTCTCAATGTTTTTCATGCTATTGTTGG-3'     | Downstream of <i>rpsL</i> lift R |
| <i>ritR</i> lift F   | 5'-GACAGCTACTTGATTGAAATCACAGC-3'        | Upstream of <i>ritR</i>          |
| <i>ritR</i> -J up R1 | 5'-GATTATATCACATTATCCATTA AAAATCAAACGGC | <i>ritR</i>                      |

|                       |                                                                                                                              |                                                |
|-----------------------|------------------------------------------------------------------------------------------------------------------------------|------------------------------------------------|
|                       | ATGGCT<br>GACCTACTTATTTTTTCGTCATA<br>-3'<br>5'-TATGACGAAAATAAGTAGGTCAGCCATGCCGTTT<br>GATTTTT<br>AATGGATAATGTGATATAATC<br>-3' | <i>Janus kan-rpsL<sup>+</sup><br/>cassette</i> |
| <i>ritR-J F</i>       |                                                                                                                              |                                                |
|                       | 5'-CACCACGCACAGTTTTAATGTAGCAGAGACCTGGG<br>CCCCTTTC<br>-3'<br>5'-GAAAGGGGCCAGGTCTCTGCTACATTA AAACTGT<br>GCGTGGTG<br>-3'       | <i>Janus kan-rpsL<sup>+</sup><br/>cassette</i> |
| <i>ritR-J R</i>       |                                                                                                                              |                                                |
|                       | 5'-GCCAATCTGTAAGCATCTTACCTG-3'<br>5'- CAACTGCAACTGCTTTTCTATTCTTGCATGGTATAT<br>AA<br>AATCCGTTTCCCATGGCTG-3'                   | <i>ritR</i>                                    |
| <i>ritR-J down F1</i> |                                                                                                                              | <i>ritR</i>                                    |
| <i>ritR lift R</i>    |                                                                                                                              | <i>Downstream of ritR</i>                      |
| <i>ritR-J up R2</i>   |                                                                                                                              | <i>ritR</i>                                    |
|                       | 5'-CAGCCATGGGGAAACGGATTTTATATACCATGCAAG<br>AATAGAAAAGCAGTTGCAGTTG-3'                                                         | <i>ritR</i>                                    |
| <i>ritR-J down F2</i> |                                                                                                                              | <i>ritR</i>                                    |
|                       | 5'-GGTCCTTGGAAC TTTCATCAGACT <b>GGC</b> GTGTTGATC<br>AATGAAGTCCCGAC-3'                                                       | <i>ritR</i>                                    |
| <i>ritR-J C128A R</i> |                                                                                                                              | <i>ritR</i>                                    |
|                       | 5'-GT<br>CGGGACTTCATTGATCAACAC <b>GCC</b> AGTCTGATGAAAG<br>TTCCAAGGACC-3'                                                    | <i>ritR</i>                                    |
| <i>ritR-J C128A F</i> |                                                                                                                              | <i>ritR</i>                                    |
|                       | 5'-GGTCCTTGGAAC TTTCATCAGACT <b>GCT</b> GTGTTGATC<br>AATGAAGTCCCGAC -3'                                                      | <i>ritR</i>                                    |
| <i>ritR-J C128S R</i> |                                                                                                                              | <i>ritR</i>                                    |
|                       | 5'-GT<br>CGGGACTTCATTGATCAACAC <b>AGC</b> AGTCTGATGAAAG<br>TTCCAAGGACC-3'                                                    | <i>ritR</i>                                    |
| <i>ritR-J C128S F</i> |                                                                                                                              | <i>ritR</i>                                    |
|                       | 5'- GGTCCTTGGAAC TTTCATCAGACT <b>GTC</b> GTGTTGAT<br>CAATGAAGTCCCGAC -3'                                                     | <i>ritR</i>                                    |
| <i>ritR-J C128D R</i> |                                                                                                                              | <i>ritR</i>                                    |
|                       | 5'-GT<br>CGGGACTTCATTGATCAACAC <b>GAC</b> AGTCTGATGAAA<br>GTTCCAAGGACC-3'                                                    | <i>ritR</i>                                    |
| <i>ritR-J C128D F</i> |                                                                                                                              | <i>ritR</i>                                    |
| <i>ritR check F</i>   | 5'-G TTCACAATGGTATTGAGTACGGTGATATG -3'                                                                                       | <i>5' of ritR lift F</i>                       |
| <i>ritR check R</i>   | 5'-CAGTTACCATAGCTCCTGATGAACGG -3'                                                                                            | <i>3' of ritR lift R</i>                       |
| <i>Ppiu-F1</i>        | 5'- <u>AATT</u> CTGAAGTTGGCATTCAAAAAATCATGTTC-3'                                                                             | <i>Ppiu</i>                                    |
| <i>Ppiu-F2</i>        | 5'-CTGAAGTTGGCATTCAAAAAATCATGTTC-3'                                                                                          | <i>Ppiu</i>                                    |
| <i>Ppiu-R1</i>        | 5'- <u>GATCCG</u> ACTAGGAGTAGAAGTAAGCC-3'                                                                                    | <i>Ppiu BS1-3</i>                              |
| <i>Ppiu-R2</i>        | 5'- <u>CGACTAGGAGTAGAAGTAAGCC</u> -3'                                                                                        | <i>Ppiu BS1-3</i>                              |
| <i>pPP2-tet-F</i>     | 5'-CCTAATCGGAAAGGTTTTCAATCCC-3'                                                                                              | <i>5' of pPP2<br/>integration site</i>         |
| <i>pPP2-tet-R</i>     | 5'-CCGATAACGATACCAAGGATGAAAC-3'                                                                                              | <i>pPP2 tet gene</i>                           |
| <i>pPP2-bga-F</i>     | 5'-GTCTTGTTGGAACCAACCAG-3'                                                                                                   | <i>pPP2 bga gene</i>                           |

|                         |                                                                                          |                                    |
|-------------------------|------------------------------------------------------------------------------------------|------------------------------------|
| <i>pPP2-bga-R</i>       | 5'-GTTTCAATCTACTATAACAATAAGAGAACG-3'                                                     | 3' of <i>pPP2</i> integration site |
| <i>pPP2-seq-F</i>       | 5'-GCATGCATCGGTACCTGCG-3'                                                                | <i>pPP2</i> plasmid                |
| <i>pPP2-seq-R</i>       | 5'-GTAAAACGACGGGATCAAGATGTTTC -3'                                                        | <i>pPP2</i> plasmid                |
| <i>RitR(FL)-F1</i>      | 5'- <u>AGGTATGGGGAAACGGATTTT</u> ATTACTGAG-3'                                            | <i>ritR</i>                        |
| <i>RitR(FL)-F2</i>      | 5'-ATGGGGAAACGGATTTTATTACTGAG-3'                                                         | <i>ritR</i>                        |
| <i>RitR(FL)-R1</i>      | <u>CTAGCCTTCTTGCATGGTATATCCAACACCAC</u>                                                  | <i>ritR</i>                        |
| <i>RitR(FL)-R2</i>      | 5'-CCTTCTTGCATGGTATATCCAACACCAC                                                          | <i>ritR</i>                        |
| <i>RitR-C128S(FL) F</i> | 5'-CGGGACTTCATTGATCAACAC <b>AGC</b> -3'                                                  | <i>ritR pE-SUMO</i>                |
| <i>RitR-C128S(FL) R</i> | 5'- <b>GCT</b> GTGTTGATCAATGAAGTCCCG-3'                                                  | <i>ritR pE-SUMO</i>                |
| <i>RitR-C128D(FL) F</i> | 5'- CGGGACTTCATTGATCAACAC <b>GAC</b> -3'                                                 | <i>ritR pE-SUMO</i>                |
| <i>RitR-C128D(FL) R</i> | 5'- <b>GTC</b> GTGTTGATCAATGAAGTCCCG -3'                                                 | <i>ritR pE-SUMO</i>                |
| <i>RitR-GADDY F</i>     | 5'- GCTGGAAGTTGTTTCAGCGT <b>GGTGCA</b> <b>GATGATT</b> ACAT<br>CTATAAGCCAGTCCTTATC<br>-3' | <i>ritR pE-SUMO</i>                |
| <i>RitR-GADDY R</i>     | 5'-<br>GATAAGGACTGGCTTATAGATGTA <b>ATCATCTGC</b> <b>ACCAC</b><br>GCTGAACAACCTCCAGC -3'   | <i>ritR pE-SUMO</i>                |
| <i>T7 F</i>             | 5'-TAATACGACTCACTATAGGG-3'                                                               | <i>pE-SUMO</i>                     |
| <i>T7 R</i>             | 5'GCTAGTTATTGCTCAGCGG-3'                                                                 | <i>pE-SUMO</i>                     |

<sup>a</sup>WT, wild-type; Kan, kanamycin; Sm, streptomycin; Spec, spectinomycin; Tet, tetracycline; *tetM*, tetracycline resistance gene; *bgaA*, pneumococcal endogenous  $\beta$ -galactosidase gene; *rpsL*, S12 ribosomal gene

<sup>b</sup>Restriction enzyme sites are underlined and italicized. Mutated sites are in color, bold and italicized.
